# Supplementary material for: A fluorescent photochromic diarylethene based on naphthalic anhydride with strong solvatochromism
Source: Royal Society of Chemistry journal article supplement (doi:10.1039/c7ra05157c), 2017-01-01
Supplement: c7ra05157c1.pdf [file c7ra05157c1.pdf]

## ***Electronic Supplementary Information (ESI)***

### **A fluorescent photochromic diarylethene based on naphthalic anhydride with strong solvatochromism**

Shangjun Chen <sup>\*a</sup>, Xin Li <sup>b</sup>, and Liwen Song <sup>c</sup>

<sup>a</sup> *Key Laboratory of Resource Chemistry of Ministry of Education, Shanghai Key Laboratory of Rare Earth Functional Materials, Department of chemistry, Shanghai Normal University, Shanghai, 200234, P. R. China.*

*E-mail: jshchen@shnu.edu.cn*

<sup>b</sup> *Division of Theoretical Chemistry and Biology, School of Biotechnology, KTH Royal Institute of Technology, SE-10691 Stockholm, Sweden.*

<sup>c</sup> *Shanghai Key Laboratory of Functional Materials Chemistry, Key Laboratory for Advanced Materials and Institute of Fine Chemicals, Collaborative Innovation Center for Coal Based Energy (i-CCE), School of Chemistry and Molecular Engineering, East China University of Science and Technology, Shanghai 200237, P.R. China.*

## Contents

|                  |                                                                                                                                                              |   |
|------------------|--------------------------------------------------------------------------------------------------------------------------------------------------------------|---|
| <b>Fig. S1</b>   | <sup>1</sup> H NMR signal changes of <b>BTE-O</b> before and after 365 nm photo-irradiation in C <sub>6</sub> D <sub>6</sub> (2.35×10 <sup>-2</sup> M) ..... | 1 |
| <b>Fig. S2</b>   | Simulated absorption spectra of <b>BTE-O</b> and <b>c-BTE-O</b> in cyclohexane .....                                                                         | 2 |
| <b>Fig. S3</b>   | Frontier molecular orbitals of <b>BTE-O</b> in cyclohexane .....                                                                                             | 3 |
| <b>Fig. S4</b>   | Frontier molecular orbitals of <b>c-BTE-O</b> in cyclohexane .....                                                                                           | 4 |
| <b>Table S1.</b> | Computed excitation energy, absorption wavelength, oscillator strength and molecular orbital composition for the lowest excited states in cyclohexane .....  | 5 |
| <b>Fig. S5</b>   | <sup>1</sup> H NMR spectra of <b>BTE-O</b> (400 MHz, CDCl <sub>3</sub> , ppm) .....                                                                          | 6 |
| <b>Fig. S6</b>   | <sup>13</sup> C NMR spectra of <b>BTE-O</b> (100 MHz, CDCl <sub>3</sub> , ppm) .....                                                                         | 7 |
| <b>Fig. S7</b>   | High resolution mass spectrum of <b>BTE-O</b> .....                                                                                                          | 8 |

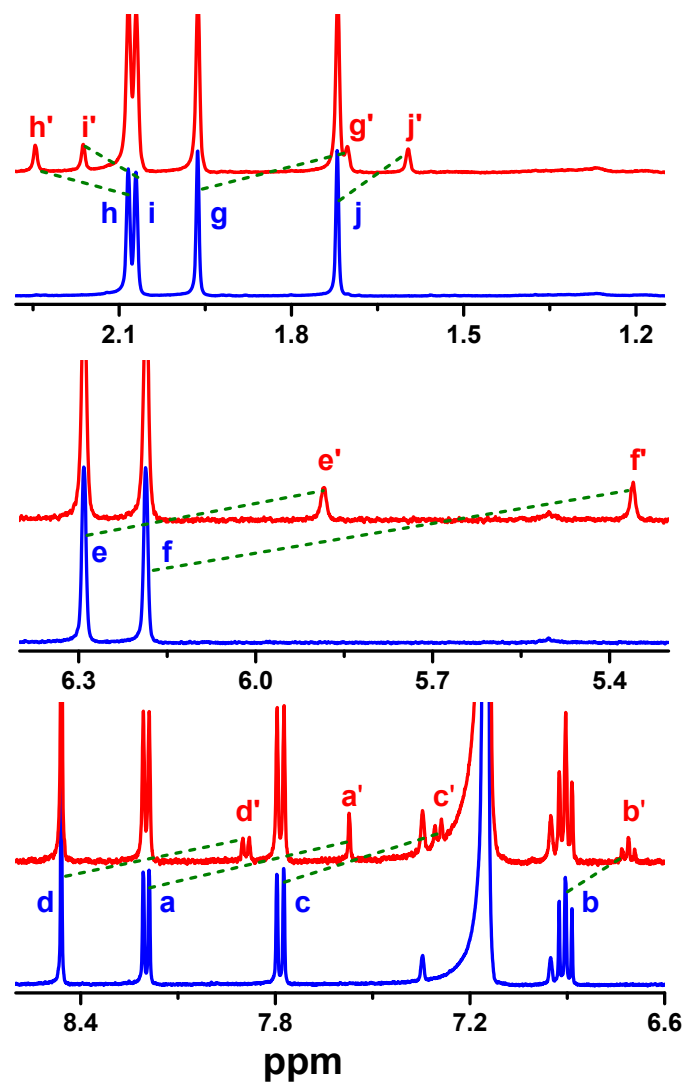

Fig. S1  $^1\text{H}$  NMR signal changes of BTE-O before and after 365 nm photo-irradiation in  $\text{C}_6\text{D}_6$  ( $2.35 \times 10^{-2}$  M).

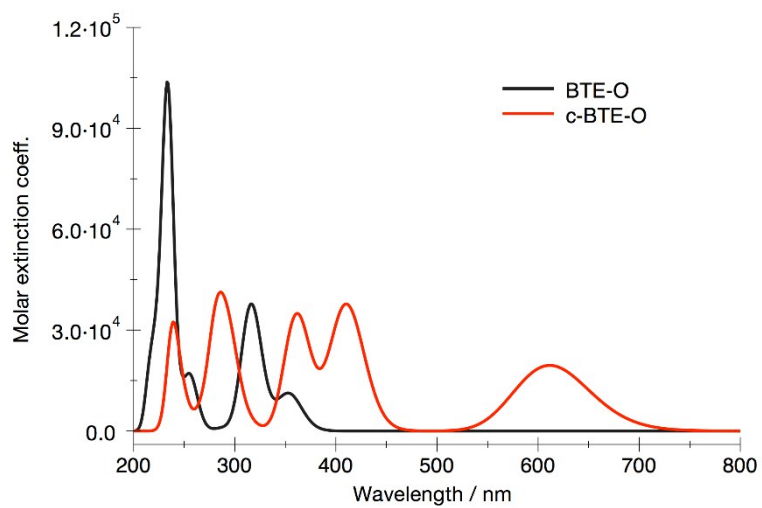

**Fig. S2** Simulated absorption spectra of **BTE-O** and **c-BTE-O** in cyclohexane.

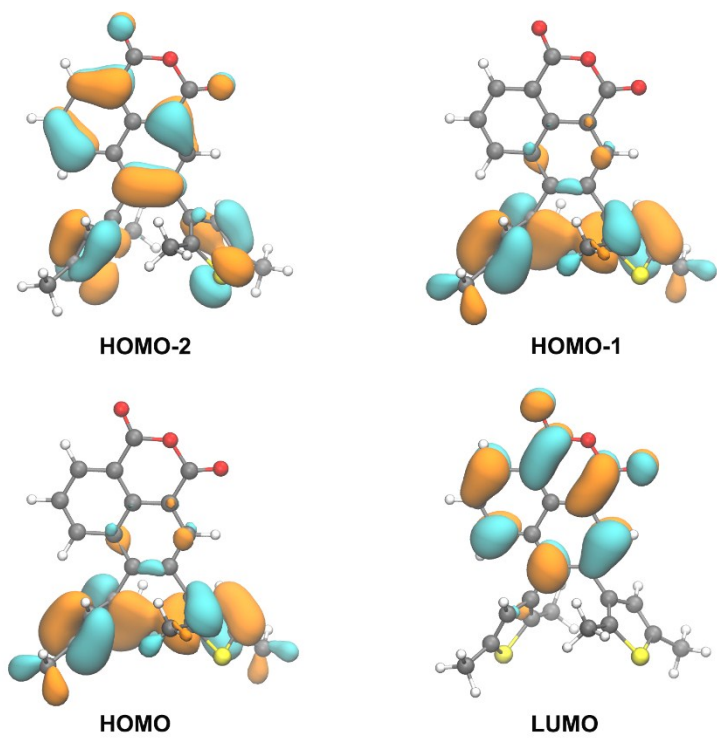

**Fig. S3** Frontier molecular orbitals of **BTE-O** in cyclohexane.

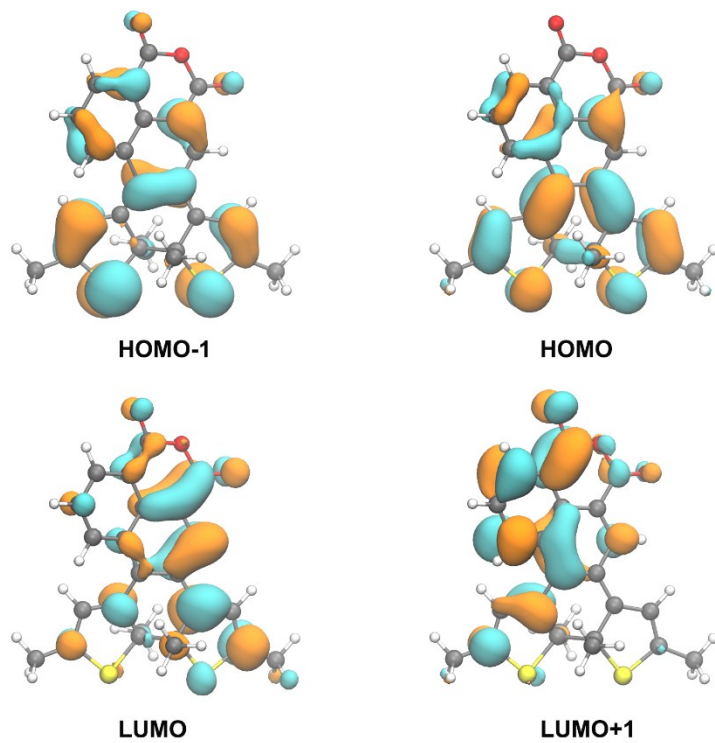

**Fig. S4** Frontier molecular orbitals of *c*-BTE-O in cyclohexane.

**Table S1.** Computed excitation energy, absorption wavelength, oscillator strength and molecular orbital composition for the lowest excited states in cyclohexane

| Compound       | Excited state | Excitation energy | Oscillator strength | MO composition                                     |
|----------------|---------------|-------------------|---------------------|----------------------------------------------------|
| <b>BTE-O</b>   | S1            | 3.50 eV, 353 nm   | 0.1199              | H → L ( 85%)                                       |
|                | S2            | 3.91 eV, 317 nm   | 0.3445              | H-2 → L ( 45%)<br>H-1 → L ( 19%)<br>H-3 → L ( 18%) |
|                | S3            | 3.96 eV, 313 nm   | 0.0681              | H-1 → L ( 48%)<br>H-2 → L ( 30%)                   |
| <b>c-BTE-O</b> | S1            | 2.02 eV, 613 nm   | 0.2103              | H → L ( 96%)                                       |
|                | S2            | 3.02 eV, 411 nm   | 0.4061              | H → L+1 ( 91%)                                     |
|                | S3            | 3.42 eV, 362 nm   | 0.3758              | H-1 → L ( 90%)                                     |

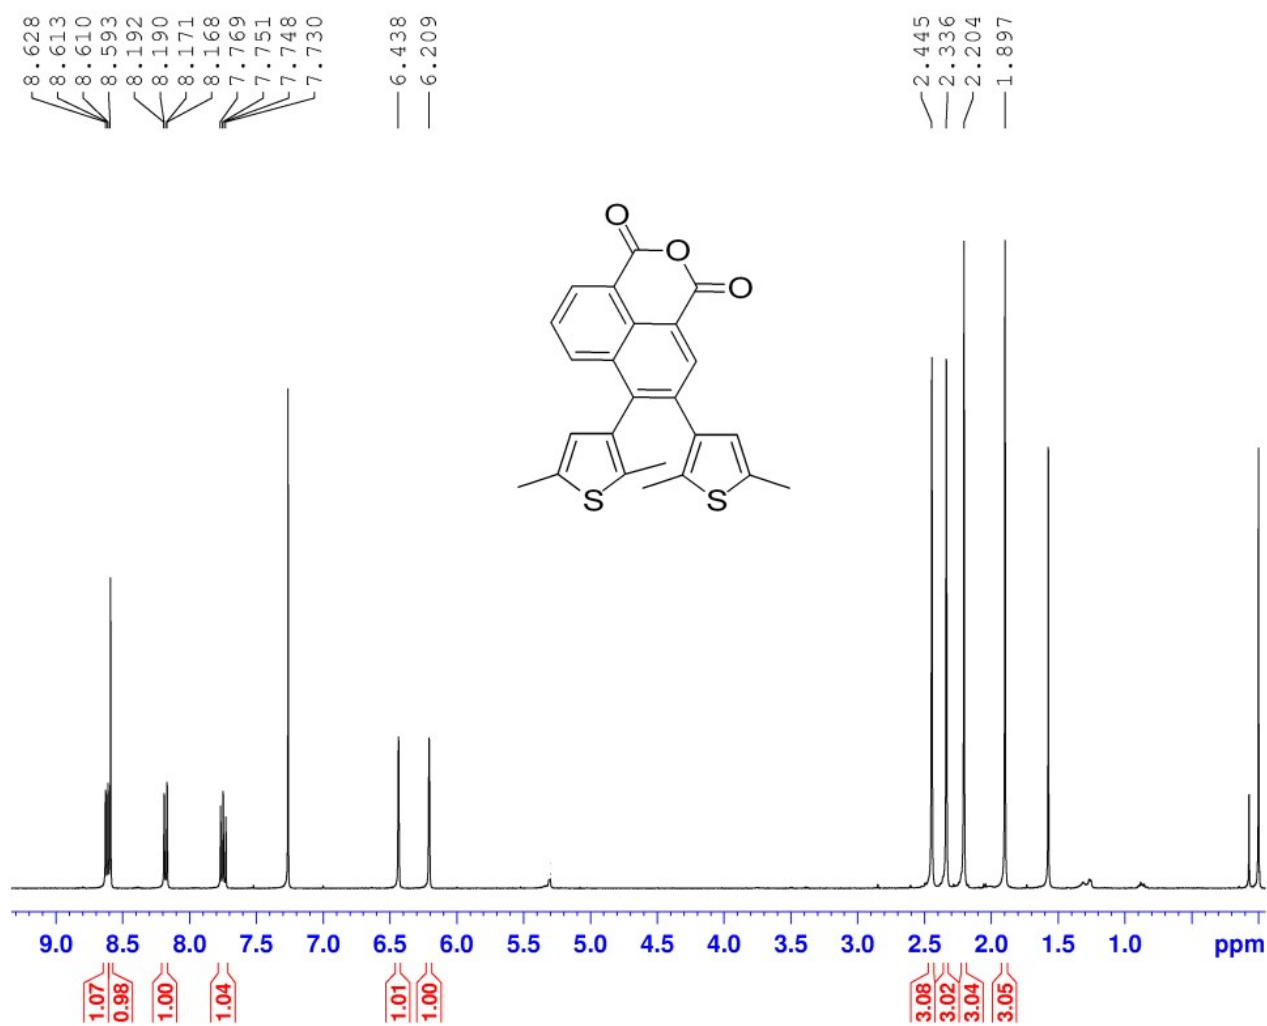

Fig. S5 <sup>1</sup>H NMR spectra of BTE-O (400 MHz, CDCl<sub>3</sub>, ppm).



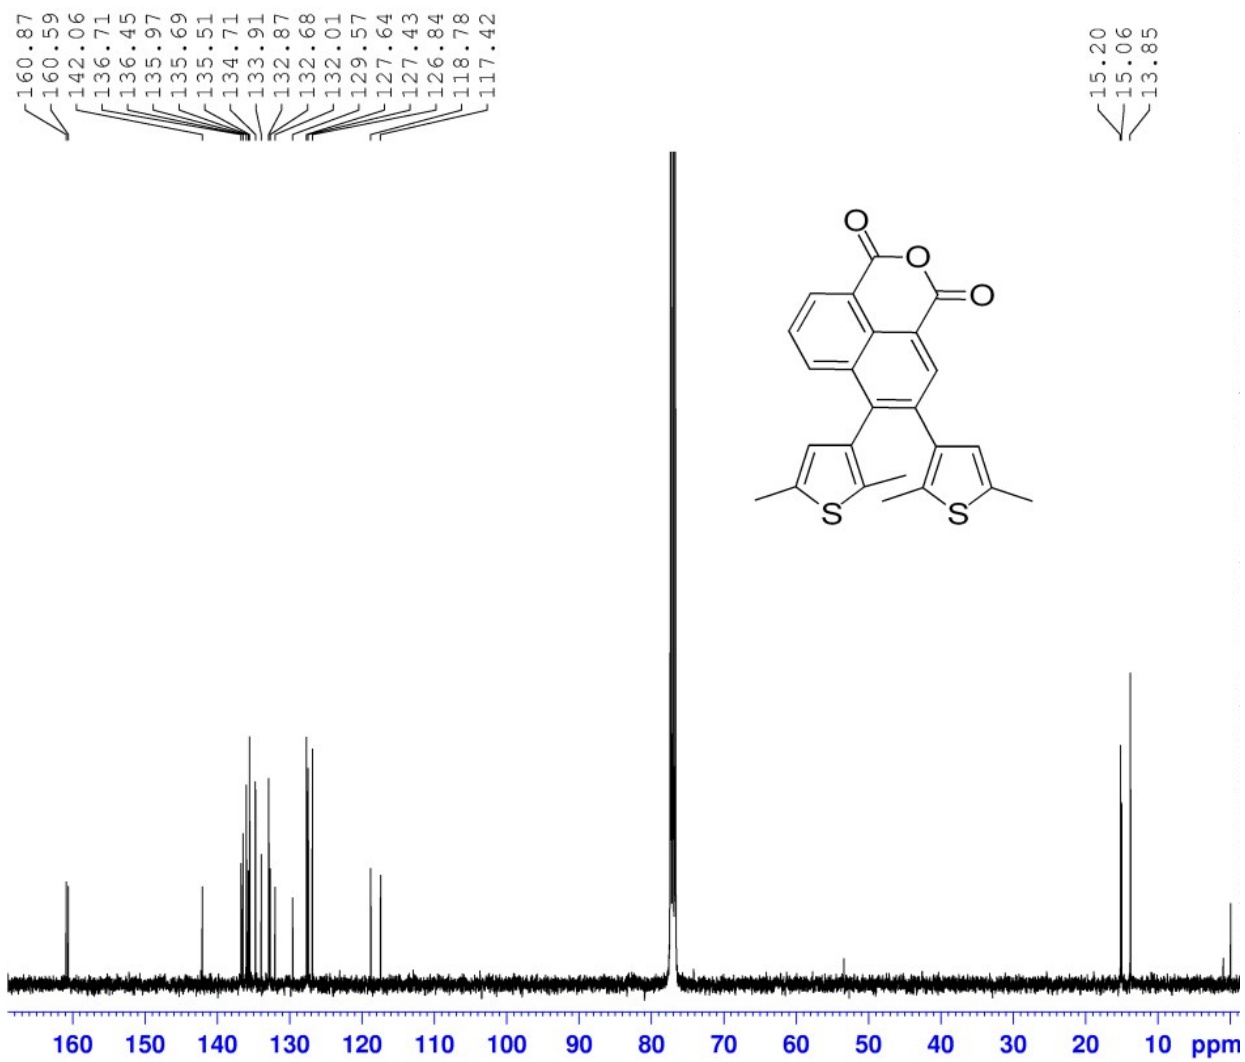

Fig. S6 <sup>13</sup>C NMR spectra of BTE-O (100 MHz, CDCl<sub>3</sub>, ppm).

Single Mass Analysis

Tolerance = 50.0 mDa / DBE: min = -1.5, max = 100.0

Element prediction: Off

Number of isotope peaks used for i-FIT = 2

Monoisotopic Mass, Even Electron Ions

400 formula(e) evaluated with 69 results within limits (up to 1 closest results for each mass)

Elements Used:

C: 0-80 H: 0-150 O: 0-12 S: 0-8

ZHU-WH

ECUST institute of Fine Chem

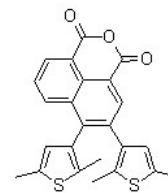

07-Dec-2011

19:33:29

1: TOF MS ES+

4.80e+003

ZWH-SLW-45 29 (0.987) Cm (25:32)

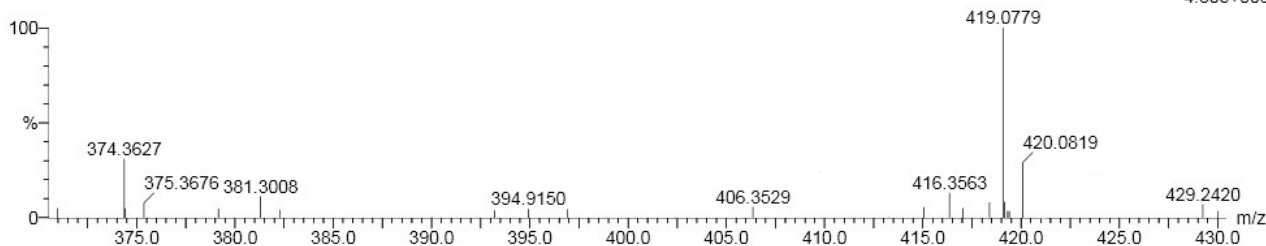

Minimum: -1.5  
Maximum: 50.0 50.0 100.0

| Mass     | Calc. Mass | mDa | PPM | DBE  | i-FIT | i-FIT (Norm) | Formula       |
|----------|------------|-----|-----|------|-------|--------------|---------------|
| 419.0779 | 419.0776   | 0.3 | 0.7 | 15.5 | 39.3  | 0.0          | C24 H19 O3 S2 |

Fig. S7 High resolution mass spectrum of BTE-O.
